# Supplementary material for: SunGold Kiwifruit Supplementation of Individuals with Prediabetes Alters Gut Microbiota and Improves Vitamin C Status, Anthropometric and Clinical Markers
Source: PubMed Central journal article supplement (PMC6073280; doi:10.3390/nu10070895), 2018-07-12
Supplement: nutrients-10-00895-s001.pdf [file nutrients-10-00895-s001.pdf]

1 **Supplementary Table 1.** OTU table collapsed to family level, showing number of curated sequences per family per sample.

2

| Individual                    | 401   | 402   | 403   | 404   | 405   | 406   | 407   | 408   | 409   | 410   | 411  | 412   | 413   | 414   | 415   | 416   | 417   | 418   | 419   | 420   | 421   | 422   | 423   | 425   | 426   | 427   | 0  |
|-------------------------------|-------|-------|-------|-------|-------|-------|-------|-------|-------|-------|------|-------|-------|-------|-------|-------|-------|-------|-------|-------|-------|-------|-------|-------|-------|-------|----|
| Time (weeks)                  | 0     | 0     | 0     | 0     | 0     | 0     | 0     | 0     | 0     | 0     | 0    | 0     | 0     | 0     | 0     | 0     | 0     | 0     | 0     | 0     | 0     | 0     | 0     | 0     | 0     | 0     | 0  |
| Family                        | 0     | 0     | 0     | 0     | 0     | 0     | 0     | 0     | 0     | 0     | 0    | 0     | 0     | 0     | 0     | 0     | 0     | 0     | 0     | 0     | 0     | 0     | 0     | 0     | 0     | 0     | 0  |
| Methanobacteriaceae           | 0     | 24    | 20    | 0     | 2     | 0     | 2     | 8     | 0     | 0     | 7    | 0     | 0     | 0     | 0     | 0     | 0     | 0     | 0     | 1     | 0     | 0     | 10    | 8     | 12    | 0     | 0  |
| Actinomycetaceae              | 1     | 8     | 0     | 1     | 1     | 0     | 0     | 1     | 20    | 0     | 2    | 2     | 0     | 0     | 0     | 0     | 0     | 1     | 1     | 0     | 0     | 0     | 2     | 5     | 0     | 2     | 3  |
| Bifidobacteriaceae            | 461   | 365   | 3     | 150   | 1031  | 2978  | 251   | 853   | 2     | 2463  | 1981 | 1771  | 339   | 1392  | 1020  | 533   | 46    | 2595  | 72    | 102   | 2266  | 354   | 1811  | 2978  | 1756  | 239   |    |
| Corynebacteriaceae            | 0     | 13    | 0     | 0     | 3     | 1     | 0     | 1     | 1     | 2     | 3    | 0     | 1     | 2     | 1     | 1     | 0     | 0     | 0     | 2     | 1     | 2     | 3     | 0     | 1     | 1     |    |
| Coriobacteriaceae             | 94    | 167   | 378   | 96    | 109   | 464   | 33    | 273   | 238   | 176   | 172  | 258   | 167   | 113   | 124   | 49    | 46    | 41    | 213   | 33    | 178   | 136   | 409   | 125   | 108   | 225   |    |
| Bacteroidaceae                | 535   | 894   | 1853  | 20744 | 8435  | 1052  | 22671 | 5259  | 1156  | 2570  | 1051 | 724   | 3517  | 1695  | 1905  | 702   | 4644  | 3785  | 320   | 2587  | 6859  | 2604  | 3087  | 1401  | 1355  | 1031  |    |
| Bacteroidales S24-7 group     | 2     | 11    | 0     | 0     | 0     | 0     | 0     | 6     | 0     | 0     | 3    | 3     | 120   | 0     | 2     | 0     | 2     | 0     | 152   | 0     | 0     | 132   | 13    | 36    | 0     | 1     |    |
| Porphyromonadaceae            | 74    | 38    | 128   | 2857  | 3616  | 488   | 18    | 854   | 59    | 338   | 515  | 224   | 206   | 134   | 124   | 476   | 3     | 147   | 10    | 284   | 403   | 286   | 0     | 235   | 284   | 264   |    |
| Prevotellaceae                | 810   | 6     | 0     | 3     | 0     | 200   | 0     | 110   | 0     | 0     | 1    | 8     | 23    | 18    | 67    | 0     | 5     | 6     | 11    | 0     | 0     | 25    | 0     | 0     | 69    | 7     |    |
| Rikenellaceae                 | 61    | 147   | 663   | 540   | 976   | 355   | 805   | 1299  | 172   | 322   | 505  | 95    | 547   | 39    | 147   | 6     | 164   | 262   | 52    | 169   | 364   | 502   | 338   | 345   | 129   | 568   |    |
| Bacteroidales                 | 0     | 0     | 0     | 5     | 0     | 0     | 0     | 0     | 0     | 0     | 0    | 0     | 37    | 0     | 0     | 0     | 0     | 0     | 0     | 0     | 0     | 0     | 0     | 0     | 0     | 0     |    |
| Flavobacteriaceae             | 0     | 0     | 0     | 0     | 0     | 0     | 0     | 14    | 0     | 0     | 0    | 0     | 2     | 0     | 0     | 0     | 0     | 0     | 0     | 0     | 0     | 0     | 0     | 0     | 0     | 0     |    |
| Gastranaerophilales           | 0     | 0     | 22    | 0     | 0     | 0     | 0     | 0     | 0     | 0     | 0    | 2     | 12    | 0     | 1     | 0     | 0     | 0     | 0     | 0     | 0     | 0     | 0     | 0     | 0     | 0     |    |
| Bacillales_Family XI          | 2     | 1     | 0     | 1     | 0     | 0     | 0     | 1     | 46    | 0     | 0    | 0     | 6     | 2     | 2     | 2     | 2     | 2     | 3     | 1     | 7     | 3     | 4     | 1     | 28    | 12    |    |
| Staphylococcaceae             | 0     | 0     | 0     | 0     | 0     | 0     | 0     | 0     | 1     | 1     | 0    | 0     | 0     | 0     | 0     | 0     | 0     | 0     | 0     | 0     | 0     | 0     | 0     | 0     | 0     | 0     |    |
| Enterococcaceae               | 0     | 0     | 0     | 316   | 0     | 1     | 0     | 1     | 0     | 0     | 1    | 0     | 0     | 25    | 2     | 1     | 0     | 2     | 0     | 1     | 911   | 2     | 2     | 0     | 2     | 261   |    |
| Lactobacillaceae              | 4     | 6     | 0     | 0     | 2     | 0     | 1     | 0     | 27    | 10    | 13   | 0     | 43    | 110   | 1     | 0     | 27    | 0     | 3     | 2     | 57    | 556   | 6917  | 375   | 103   |       |    |
| Leuconostocaceae              | 0     | 0     | 0     | 0     | 5     | 0     | 0     | 0     | 4     | 0     | 0    | 1     | 1     | 1     | 1     | 1     | 0     | 1     | 1     | 0     | 0     | 0     | 0     | 0     | 7     | 0     |    |
| Streptococcaceae              | 202   | 86    | 22    | 71    | 32    | 28    | 24    | 2     | 572   | 63    | 61   | 225   | 12    | 110   | 46    | 55    | 63    | 54    | 3     | 47    | 348   | 18    | 1760  | 8     | 82    | 328   |    |
| Caldicoprobacteraceae         | 0     | 0     | 2     | 0     | 0     | 1     | 1     | 0     | 0     | 0     | 0    | 0     | 0     | 0     | 0     | 0     | 0     | 0     | 0     | 0     | 0     | 1     | 0     | 0     | 0     | 2     |    |
| Christensenellaceae           | 1478  | 1500  | 3023  | 280   | 344   | 563   | 1674  | 8228  | 36    | 130   | 1204 | 326   | 5138  | 2     | 883   | 2     | 152   | 9     | 380   | 8754  | 324   | 1654  | 359   | 780   | 388   | 1743  |    |
| Clostridiaceae 1              | 9     | 278   | 90    | 1932  | 859   | 346   | 14    | 4633  | 1     | 37    | 3226 | 5     | 7     | 7094  | 30    | 1745  | 268   | 3     | 4     | 37    | 187   | 1650  | 432   | 2     | 2265  | 6324  |    |
| Clostridiales vadinBB60 group | 0     | 114   | 28    | 5     | 17    | 0     | 7     | 15    | 17    | 3     | 38   | 1     | 49    | 0     | 2     | 0     | 1     | 0     | 0     | 0     | 0     | 0     | 9     | 9     | 32    | 0     | 10 |
| Deffluvitalesaceae            | 4     | 9     | 237   | 4     | 17    | 21    | 19    | 73    | 0     | 35    | 4    | 4     | 0     | 2     | 0     | 0     | 0     | 0     | 1     | 2     | 1     | 13    | 44    | 16    | 0     | 57    |    |
| Eubacteriaceae                | 0     | 35    | 11    | 10    | 0     | 11    | 0     | 178   | 2     | 3     | 0    | 3     | 0     | 1     | 0     | 1     | 0     | 1     | 5     | 0     | 7     | 1     | 0     | 0     | 0     | 2     |    |
| Clostridiales_Family XI       | 0     | 33    | 0     | 1     | 0     | 0     | 0     | 22    | 0     | 0     | 0    | 3     | 1     | 0     | 0     | 0     | 4     | 0     | 1     | 0     | 0     | 1     | 0     | 1     | 0     | 2     |    |
| Clostridiales_Family XIII     | 14    | 2050  | 136   | 69    | 54    | 131   | 100   | 294   | 271   | 105   | 785  | 59    | 215   | 3     | 37    | 0     | 87    | 962   | 51    | 66    | 49    | 410   | 277   | 108   | 384   | 80    |    |
| Lachnospiraceae               | 32549 | 51343 | 48935 | 15729 | 31931 | 61059 | 49446 | 35342 | 58008 | 39993 | 7623 | 55606 | 13767 | 51079 | 26829 | 17030 | 29376 | 16061 | 43952 | 33538 | 33930 | 23907 | 41697 | 31463 | 34619 | 27815 |    |
| Peptococcaceae                | 0     | 12    | 56    | 3     | 2     | 35    | 34    | 17    | 14    | 62    | 0    | 8     | 0     | 2     | 0     | 0     | 3     | 0     | 154   | 1     | 0     | 191   | 24    | 15    | 3     | 1     |    |
| Peptostreptococcaceae         | 414   | 2757  | 204   | 2068  | 6374  | 2654  | 582   | 2076  | 5     | 942   | 6784 | 708   | 341   | 7902  | 360   | 10636 | 8     | 101   | 7     | 8     | 4212  | 5582  | 97    | 190   | 752   | 7742  |    |
| Ruminococcaceae               | 14179 | 14449 | 12663 | 7958  | 21439 | 17686 | 29932 | 34509 | 5039  | 13501 | 8123 | 9477  | 13213 | 5676  | 14541 | 14079 | 8312  | 8373  | 8725  | 12064 | 15481 | 22738 | 13859 | 10578 | 11738 | 20243 |    |
| Thermoanaerobacteraceae       | 0     | 0     | 1     | 0     | 2     | 0     | 0     | 0     | 0     | 3     | 0    | 0     | 0     | 0     | 0     | 0     | 0     | 0     | 0     | 0     | 1     | 0     | 0     | 0     | 0     | 0     |    |
| Erspilobtrichaceae            | 3074  | 6118  | 1580  | 2376  | 2148  | 8274  | 605   | 6452  | 2499  | 1884  | 1976 | 6296  | 1301  | 3184  | 2626  | 3961  | 3619  | 5320  | 6036  | 356   | 2010  | 3164  | 4081  | 653   | 5923  | 5342  |    |
| Acidaminococcaceae            | 0     | 9     | 0     | 128   | 187   | 0     | 0     | 12    | 137   | 66    | 0    | 220   | 213   | 136   | 0     | 0     | 221   | 4     | 2     | 1     | 4     | 0     | 263   | 79    | 102   | 5     |    |
| Veillonellaceae               | 2057  | 37    | 348   | 59    | 828   | 10    | 2521  | 721   | 2140  | 30    | 20   | 130   | 27    | 121   | 3     | 820   | 79    | 16    | 4     | 33    | 355   | 2567  | 17    | 252   | 460   | 120   |    |
| Fusobacteriaceae              | 0     | 0     | 0     | 1     | 0     | 0     | 0     | 2     | 0     | 0     | 2    | 0     | 0     | 0     | 0     | 1     | 0     | 0     | 0     | 2     | 0     | 0     | 0     | 0     | 0     | 1     |    |
| Lactotrichaceae               | 0     | 0     | 0     | 0     | 0     | 0     | 0     | 0     | 0     | 0     | 0    | 0     | 0     | 0     | 0     | 0     | 0     | 0     | 0     | 0     | 0     | 0     | 0     | 0     | 0     | 0     |    |
| Victivallaceae                | 0     | 0     | 0     | 0     | 0     | 0     | 0     | 0     | 0     | 0     | 0    | 0     | 1     | 0     | 0     | 0     | 0     | 0     | 0     | 0     | 0     | 0     | 0     | 0     | 0     | 0     |    |
| Victivallales_vadinBE37       | 0     | 0     | 0     | 0     | 0     | 0     | 0     | 0     | 0     | 0     | 0    | 0     | 0     | 0     | 0     | 0     | 0     | 0     | 0     | 0     | 0     | 0     | 1     | 0     | 0     | 0     |    |
| Rhizobiaceae                  | 0     | 0     | 0     | 0     | 0     | 0     | 0     | 0     | 0     | 0     | 0    | 0     | 0     | 0     | 0     | 0     | 0     | 0     | 0     | 0     | 0     | 0     | 0     | 0     | 0     | 0     |    |
| Rhodospirillaceae             | 0     | 12    | 0     | 0     | 0     | 0     | 18    | 0     | 0     | 0     | 0    | 2     | 0     | 1     | 0     | 0     | 0     | 0     | 5     | 0     | 0     | 0     | 0     | 0     | 0     | 0     |    |
| Alkalinigenaceae              | 0     | 3     | 3     | 0     | 17    | 0     | 1     | 5     | 0     | 4     | 3    | 3     | 0     | 4     | 0     | 0     | 0     | 0     | 2     | 0     | 17    | 4     | 3     | 1     | 0     | 1     |    |
| Oxalobacteraceae              | 0     | 1     | 0     | 0     | 0     | 0     | 0     | 0     | 0     | 0     | 2    | 0     | 0     | 0     | 0     | 0     | 0     | 2     | 0     | 0     | 0     | 0     | 0     | 0     | 0     | 0     |    |
| Neisseriaceae                 | 0     | 0     | 0     | 0     | 0     | 0     | 0     | 0     | 0     | 0     | 0    | 0     | 0     | 0     | 0     | 0     | 0     | 0     | 0     | 0     | 0     | 0     | 0     | 0     | 0     | 0     |    |
| Desulfovibrionaceae           | 5     | 32    | 4     | 106   | 87    | 6     | 222   | 142   | 0     | 13    | 62   | 12    | 34    | 3     | 19    | 0     | 42    | 50    | 165   | 13    | 25    | 9     | 175   | 4     | 1     | 17    |    |
| Campylobacteraceae            | 0     | 0     | 0     | 0     | 0     | 0     | 0     | 0     | 0     | 0     | 0    | 0     | 0     | 0     | 0     | 0     | 0     | 0     | 0     | 0     | 0     | 0     | 0     | 0     | 0     | 0     |    |
| Aeromonadaceae                | 0     | 0     | 0     | 0     | 0     | 0     | 0     | 0     | 0     | 0     | 0    | 0     | 0     | 0     | 0     | 0     | 0     | 0     | 0     | 0     | 0     | 0     | 0     | 0     | 0     | 11    |    |
| Cardiobacteriaceae            | 0     | 0     | 0     | 0     | 0     | 0     | 0     | 0     | 0     | 0     | 0    | 0     | 0     | 0     | 0     | 0     | 0     | 0     | 0     | 0     | 0     | 0     | 0     | 0     | 0     | 0     |    |
| Enterobacteriaceae            | 3     | 15    | 4     | 235   | 33    | 0     | 1     | 3     | 1     | 9     | 15   | 0     | 51    | 13    | 0     | 1     | 0     | 0     | 0     | 1948  | 19    | 43    | 1     | 20    | 202   | 271   |    |
| Pasteurellaceae               | 82    | 2     | 0     | 5     | 8     | 0     | 409   | 0     | 0     | 2     | 0    | 0     | 0     | 0     | 1     | 189   | 1     | 2     | 0     | 7     | 96    | 18    | 1     | 0     | 212   | 100   |    |
| Moraxellaceae                 | 0     | 0     | 0     | 0     | 1     | 0     | 0     | 0     | 0     | 0     | 0    | 0     | 1     | 0     | 0     | 0     | 0     | 0     | 0     | 0     | 0     | 0     | 0     | 0     | 0     | 0     |    |
| Pseudomonadaceae              | 0     | 0     | 0     | 0     | 0     | 0     | 0     | 0     | 0     | 0     | 0    | 0     | 0     | 0     | 0     | 0     | 0     | 0     | 0     | 0     | 0     | 0     | 0     | 0     | 0     | 0     |    |
| Spirochaetaceae               | 0     | 0     | 0     | 0     | 0     | 0     | 2     | 0     | 0     | 0     | 0    | 0     |       |       |       |       |       |       |       |       |       |       |       |       |       |       |    |



| Individual                    | 401   | 402   | 403   | 404   | 405   | 406   | 407   | 408   | 410   | 411   | 412   | 413   | 414   | 415   | 416   | 417   | 419   | 420   | 421   | 422   | 423   | 425   | 426   | 427   |  |
|-------------------------------|-------|-------|-------|-------|-------|-------|-------|-------|-------|-------|-------|-------|-------|-------|-------|-------|-------|-------|-------|-------|-------|-------|-------|-------|--|
| Time (weeks)                  | 12    | 12    | 12    | 12    | 12    | 12    | 12    | 12    | 12    | 12    | 12    | 12    | 12    | 12    | 12    | 12    | 12    | 12    | 12    | 12    | 12    | 12    | 12    | 12    |  |
| <b>Family</b>                 |       |       |       |       |       |       |       |       |       |       |       |       |       |       |       |       |       |       |       |       |       |       |       |       |  |
| Methanobacteriaceae           | 0     | 5     | 6     | 0     | 2     | 0     | 0     | 0     | 5     | 0     | 0     | 0     | 0     | 0     | 0     | 0     | 0     | 0     | 10    | 10    | 9     | 0     | 0     | 3     |  |
| Actinomycetaceae              | 0     | 0     | 0     | 3     | 3     | 1     | 0     | 0     | 0     | 0     | 1     | 0     | 1     | 3     | 0     | 0     | 1     | 2     | 3     | 0     | 3     | 2     | 2     | 3     |  |
| Bifidobacteriaceae            | 1685  | 155   | 2     | 876   | 680   | 1549  | 37    | 359   | 3054  | 2569  | 695   | 563   | 1458  | 1097  | 1403  | 329   | 227   | 17    | 1092  | 786   | 2682  | 279   | 571   | 1273  |  |
| Corynebacteriaceae            | 0     | 5     | 0     | 0     | 1     | 0     | 0     | 0     | 0     | 0     | 1     | 0     | 2     | 0     | 4     | 1     | 1     | 15    | 0     | 0     | 0     | 1     | 1     | 3     |  |
| Coriobacteriaceae             | 298   | 998   | 2073  | 1528  | 1469  | 619   | 82    | 794   | 319   | 572   | 362   | 406   | 62    | 361   | 62    | 730   | 291   | 332   | 469   | 277   | 586   | 392   | 1307  | 1047  |  |
| Bacteroidaceae                | 1546  | 575   | 692   | 627   | 10283 | 588   | 11887 | 7233  | 10009 | 3030  | 3561  | 3452  | 743   | 1656  | 237   | 2742  | 10396 | 3090  | 4148  | 2306  | 2387  | 1573  | 327   | 3639  |  |
| Bacteroidales S24-7 group     | 0     | 1     | 0     | 0     | 0     | 0     | 0     | 0     | 2     | 0     | 1     | 13    | 56    | 0     | 1     | 0     | 1     | 2411  | 912   | 0     | 18    | 32    | 0     | 23    |  |
| Porphyromonadaceae            | 694   | 67    | 157   | 134   | 3635  | 195   | 315   | 1339  | 1656  | 376   | 767   | 414   | 78    | 141   | 58    | 1     | 168   | 199   | 208   | 366   | 461   | 196   | 87    | 0     |  |
| Prevotellaceae                | 682   | 0     | 0     | 1     | 1     | 76    | 0     | 240   | 0     | 0     | 117   | 64    | 3     | 89    | 0     | 2     | 53    | 0     | 0     | 308   | 0     | 6     | 0     | 0     |  |
| Rikenellaceae                 | 45    | 192   | 685   | 86    | 2202  | 198   | 670   | 3029  | 2062  | 1149  | 506   | 1178  | 31    | 172   | 5     | 191   | 273   | 472   | 1710  | 931   | 833   | 155   | 123   | 748   |  |
| Bacteroidales                 | 0     | 0     | 1     | 0     | 0     | 0     | 0     | 0     | 0     | 0     | 0     | 54    | 0     | 0     | 0     | 0     | 0     | 0     | 0     | 0     | 0     | 0     | 0     | 0     |  |
| Flavobacteriaceae             | 0     | 0     | 0     | 0     | 0     | 0     | 0     | 19    | 0     | 0     | 0     | 41    | 0     | 0     | 0     | 1     | 0     | 0     | 0     | 0     | 0     | 0     | 0     | 0     |  |
| Gastranaerophilales           | 0     | 0     | 28    | 0     | 0     | 0     | 0     | 0     | 0     | 0     | 12    | 27    | 0     | 0     | 0     | 0     | 0     | 0     | 0     | 0     | 0     | 0     | 0     | 0     |  |
| Bacillales_Family XI          | 2     | 4     | 0     | 2     | 3     | 0     | 0     | 0     | 0     | 1     | 2     | 0     | 3     | 2     | 8     | 10    | 1     | 5     | 0     | 0     | 3     | 16    | 2     | 6     |  |
| Staphylococcaceae             | 1     | 0     | 0     | 1     | 0     | 0     | 0     | 0     | 0     | 0     | 0     | 0     | 0     | 0     | 0     | 0     | 0     | 0     | 2     | 0     | 0     | 1     | 0     | 0     |  |
| Enterococcaceae               | 1     | 0     | 0     | 367   | 0     | 0     | 0     | 0     | 0     | 44    | 0     | 1     | 0     | 3     | 1     | 0     | 0     | 0     | 64    | 0     | 0     | 153   | 2     | 1     |  |
| Lactobacillaceae              | 3     | 10    | 0     | 1     | 0     | 1     | 0     | 0     | 0     | 97    | 0     | 3     | 4     | 115   | 1     | 0     | 1     | 4     | 104   | 85    | 1182  | 216   | 385   | 205   |  |
| Leuconostocaceae              | 1     | 0     | 0     | 1     | 0     | 0     | 0     | 0     | 0     | 0     | 5     | 0     | 0     | 1     | 0     | 0     | 0     | 3     | 0     | 0     | 0     | 0     | 0     | 0     |  |
| Streptococcaceae              | 141   | 281   | 22    | 283   | 11    | 20    | 34    | 1     | 42    | 100   | 31    | 9     | 72    | 149   | 38    | 64    | 5     | 167   | 76    | 18    | 66    | 278   | 248   | 1061  |  |
| Caldicoprobacteraceae         | 0     | 0     | 0     | 0     | 0     | 0     | 1     | 0     | 0     | 0     | 0     | 2     | 0     | 0     | 0     | 1     | 0     | 0     | 1     | 0     | 0     | 0     | 0     | 2     |  |
| Christensenellaceae           | 885   | 1061  | 3875  | 362   | 1120  | 269   | 1175  | 3239  | 126   | 2168  | 530   | 11756 | 2     | 190   | 1     | 11    | 311   | 4641  | 1144  | 1419  | 1036  | 520   | 918   | 203   |  |
| Clostridiaecae 1              | 78    | 738   | 3     | 15912 | 984   | 557   | 0     | 1127  | 383   | 2191  | 11    | 1078  | 404   | 39    | 1038  | 10    | 1     | 1423  | 268   | 395   | 10    | 5703  | 2195  | 8     |  |
| Clostridiales vadinBB60 group | 0     | 54    | 23    | 6     | 28    | 3     | 2     | 30    | 8     | 3     | 1     | 428   | 0     | 0     | 0     | 0     | 0     | 3     | 61    | 11    | 8     | 0     | 3     | 3     |  |
| Deffluvitaceae                | 0     | 3     | 160   | 38    | 37    | 20    | 23    | 12    | 0     | 5     | 8     | 4     | 0     | 1     | 0     | 0     | 1     | 1     | 6     | 10    | 4     | 1     | 14    | 15    |  |
| Eubacteriaceae                | 0     | 11    | 6     | 0     | 3     | 0     | 9     | 1     | 1     | 1     | 0     | 4     | 0     | 0     | 0     | 13    | 7     | 2     | 0     | 1     | 1     | 2     | 5     | 2     |  |
| Clostridiales_Family XI       | 0     | 0     | 1     | 2     | 8     | 1     | 0     | 0     | 4     | 0     | 1     | 26    | 1     | 4     | 0     | 1     | 0     | 1     | 2     | 0     | 0     | 0     | 2     | 0     |  |
| Clostridiales_Family XIII     | 20    | 1396  | 113   | 130   | 45    | 70    | 67    | 128   | 53    | 1210  | 55    | 367   | 3     | 32    | 3     | 150   | 43    | 119   | 115   | 319   | 69    | 364   | 60    | 181   |  |
| Lachnospiraceae               | 42375 | 32326 | 61673 | 18550 | 28536 | 21556 | 32214 | 22686 | 22498 | 26429 | 65476 | 34713 | 48920 | 35800 | 32196 | 70198 | 39933 | 25639 | 21488 | 27421 | 32514 | 17388 | 30327 | 40753 |  |
| Peptococcaceae                | 1     | 2     | 47    | 13    | 3     | 2     | 20    | 22    | 17    | 41    | 1     | 6     | 0     | 1     | 0     | 0     | 90    | 1     | 17    | 230   | 18    | 0     | 0     | 5     |  |
| Peptostreptococcaceae         | 973   | 3435  | 17    | 8579  | 5794  | 3949  | 125   | 1300  | 899   | 7748  | 85    | 332   | 5060  | 1025  | 9914  | 662   | 69    | 5848  | 3884  | 2848  | 728   | 756   | 6918  | 206   |  |
| Ruminococcaceae               | 14965 | 12334 | 13504 | 7674  | 25016 | 10364 | 19856 | 25146 | 15446 | 21522 | 23256 | 21478 | 9948  | 19189 | 16874 | 12074 | 13851 | 10102 | 13427 | 23222 | 18577 | 6436  | 18558 | 17472 |  |
| Thermoanaerobacteraceae       | 0     | 0     | 0     | 0     | 4     | 0     | 4     | 1     | 0     | 0     | 0     | 0     | 0     | 0     | 0     | 0     | 0     | 0     | 0     | 3     | 0     | 0     | 0     | 0     |  |
| Erysipelotrichaceae           | 2629  | 8218  | 2770  | 10943 | 4376  | 7974  | 455   | 3988  | 1282  | 3649  | 5514  | 1492  | 1219  | 2619  | 8621  | 7554  | 3516  | 965   | 2248  | 3525  | 1038  | 2464  | 2715  | 1527  |  |
| Acidaminococcaceae            | 0     | 4     | 1     | 10    | 238   | 0     | 0     | 23    | 130   | 7     | 514   | 9     | 26    | 0     | 0     | 12    | 14    | 0     | 47    | 0     | 8     | 461   | 1     | 110   |  |
| Vailloniellaceae              | 853   | 13    | 299   | 56    | 511   | 2     | 1431  | 1231  | 5     | 36    | 282   | 9     | 402   | 9     | 705   | 186   | 7     | 211   | 31    | 3483  | 214   | 172   | 13    | 11    |  |
| Fusobacteriaceae              | 0     | 0     | 0     | 0     | 0     | 0     | 0     | 0     | 0     | 0     | 0     | 0     | 0     | 0     | 3     | 0     | 0     | 1     | 0     | 0     | 0     | 0     | 0     | 8     |  |
| Leptotrichiaceae              | 0     | 0     | 0     | 0     | 0     | 0     | 0     | 0     | 0     | 0     | 0     | 0     | 0     | 0     | 0     | 0     | 0     | 2     | 0     | 0     | 0     | 0     | 0     | 0     |  |
| Victivallaceae                | 0     | 1     | 0     | 0     | 0     | 0     | 0     | 0     | 0     | 0     | 0     | 5     | 0     | 0     | 0     | 0     | 0     | 0     | 0     | 0     | 0     | 0     | 0     | 0     |  |
| Victivallales_vadinBE97       | 0     | 0     | 0     | 0     | 0     | 0     | 0     | 0     | 0     | 0     | 0     | 0     | 0     | 0     | 0     | 0     | 0     | 0     | 0     | 3     | 0     | 0     | 0     | 0     |  |
| Rhizobiaceae                  | 0     | 0     | 0     | 0     | 0     | 0     | 0     | 0     | 0     | 0     | 0     | 0     | 0     | 0     | 0     | 0     | 0     | 0     | 0     | 0     | 0     | 0     | 0     | 0     |  |
| Rhodospirillaceae             | 0     | 7     | 0     | 0     | 0     | 0     | 0     | 54    | 0     | 0     | 19    | 4     | 0     | 0     | 0     | 0     | 18    | 0     | 0     | 0     | 0     | 0     | 0     | 0     |  |
| Alcaligenaceae                | 0     | 0     | 1     | 0     | 10    | 0     | 0     | 8     | 3     | 47    | 22    | 6     | 0     | 3     | 3     | 1     | 1     | 12    | 5     | 1     | 0     | 1     | 7     | 0     |  |
| Oxalobacteraceae              | 0     | 0     | 2     | 0     | 0     | 0     | 0     | 0     | 0     | 1     | 0     | 1     | 0     | 0     | 0     | 0     | 3     | 0     | 1     | 0     | 3     | 0     | 0     | 0     |  |
| Neisseriaceae                 | 0     | 0     | 0     | 0     | 0     | 0     | 0     | 0     | 0     | 0     | 0     | 0     | 0     | 0     | 0     | 0     | 0     | 0     | 0     | 0     | 0     | 0     | 0     | 0     |  |
| Desulfotribionaceae           | 1     | 8     | 4     | 3     | 36    | 5     | 85    | 110   | 3     | 27    | 62    | 36    | 121   | 5     | 1     | 61    | 112   | 2     | 31    | 6     | 35    | 2     | 7     | 358   |  |
| Campylobacteraceae            | 0     | 0     | 0     | 0     | 0     | 0     | 0     | 0     | 0     | 0     | 0     | 0     | 0     | 0     | 0     | 0     | 0     | 0     | 0     | 0     | 0     | 0     | 0     | 0     |  |
| Aeromonadaceae                | 0     | 0     | 0     | 0     | 0     | 0     | 0     | 0     | 0     | 0     | 0     | 0     | 0     | 0     | 0     | 0     | 0     | 0     | 0     | 0     | 0     | 2     | 0     | 0     |  |
| Cardiobacteriaceae            | 0     | 3     | 0     | 0     | 0     | 0     | 0     | 0     | 0     | 0     | 0     | 0     | 0     | 0     | 0     | 0     | 0     | 1     | 0     | 0     | 0     | 0     | 0     | 0     |  |
| Enterobacteriaceae            | 0     | 3     | 0     | 16    | 0     | 0     | 0     | 4     | 27    | 27    | 2     | 10    | 56    | 1     | 279   | 1     | 12    | 6360  | 97    | 61    | 3     | 14549 | 0     | 0     |  |
| Pasteurellaceae               | 12    | 1     | 1     | 0     | 0     | 0     | 82    | 15    | 1     | 165   | 0     | 0     | 2     | 9     | 122   | 14    | 0     | 99    | 3     | 23    | 1     | 370   | 3     | 0     |  |
| Moraxellaceae                 | 0     | 1     | 0     | 0     | 1     | 0     | 0     | 0     | 1     | 0     | 0     | 0     | 0     | 0     | 0     | 0     | 0     | 0     | 0     | 0     | 0     | 0     | 0     | 1     |  |
| Pseudomonadaceae              | 0     | 0     | 0     | 0     | 0     | 0     | 0     | 0     | 0     | 0     | 0     | 0     | 0     | 0     | 0     | 0     | 0     | 0     | 0     | 0     | 0     | 0     | 0     | 0     |  |
| Spirochaetaceae               | 0     | 0     | 0     | 0     | 0     | 0     | 0     | 0     | 0     | 0     | 0     | 0     | 0     | 0     | 0     | 0     | 0     | 0     | 0     | 0     | 0     | 0     | 0     | 0     |  |
| Anaeroplasmataceae            | 0     | 0     | 0     | 0     | 0     | 0     | 0     | 0     | 0     | 0     | 0     | 0     | 0     | 0     | 0     | 0     | 0     | 0     | 0     | 16    | 0     | 0     | 0     | 0     |  |
| Mollicutes_RF9_uncultured     | 2674  | 2     | 376   | 11    | 10    | 0     | 62    | 378   | 0     | 1     | 18    | 199   | 2     | 1     | 0     | 0     | 338   | 1     | 0     | 954   | 377   | 31    | 2     | 0     |  |
| Mollicutes_N81-n              | 0     | 0     | 28    | 0     | 0     | 0     | 0     | 0     | 0     | 0     | 0     | 0     | 0     | 0     | 0     | 0     | 0     | 0     | 0     | 0     | 0     | 0     | 0     | 0     |  |
| Opitutae vadinHA64            | 0     | 0     | 0     | 0     | 0     | 0     | 0     | 0     | 0     | 0     | 0     | 3     | 0     | 0     | 0     | 0     | 0     | 0     | 0     | 0     | 0     | 0     | 0     | 0     |  |
| Verrucomicrobiaceae           | 0     | 27    | 2     | 517   | 34    | 1     | 4     | 115   | 0     | 0     | 1     | 6084  | 1     | 6     | 1     | 2     | 380   | 140   | 654   | 0     | 111   | 20    | 14    | 1692  |  |
